# Supplementary material for: What happens if we ‘burn all the carbon’? carbon reserves, carbon budgets, and policy options for governments
Source: Royal Society of Chemistry journal article supplement (doi:10.1039/d3ea00107e), 2024-01-01
Supplement: d3ea00107e1.xlsx [file d3ea00107e1.xlsx]

## Sheet: Calc
Global Proved Coal Reserves /tonnes		Coal			Oil			Oil sands			Natural Gas			Shale tight oil			Shale gas
1074108000000	2021 (ref 1)	m(coal) /metric tonnes	753600000000		V(oil) /barrels	1734800000000		V(oil) /barrels	423200000000		V(gas) / 10^9m^3	188100		V(oil) /barrels	418900000000		V(gas) / ft^3	7576600000000000
Global Proved Oil Reserves /barrels		m (carbon) /metric tonnes	678240000000		m (oil) /metric tonnes	236626720000		m (oil) /metric tonnes	57724480000		E(gas) / 10^12 btu	6.41816e+06		m (oil) /metric tonnes	57137960000		V(gas /m^3	2.14543e+14
1734800000000	2021 (ref 1)	m(CO2) /metric tonnes	2486880000000		m (carbon) /metric tonnes	201132712000		m (carbon) /metric tonnes	49065808000		E(gas) /10^6 btu	6.41816e+12		m (carbon) /metric tonnes	48567266000		V(gas) / 10^9m^3	214543
Oil Sands reserves /barrels		fract CO2/total atmosphere	0.000483077		m(CO2) /metric tonnes	7.37487e+11		m(CO2) /metric tonnes	1.79908e+11		m(carbon) /kg	9.26141e+13		m(CO2) /metric tonnes	1.7808e+11		E(gas) / 10^12 btu	7.32044e+06
423200000000	2021 (ref 1)	Prop of CO2 /ppm by wt	483.077		fract CO2/total atmosphere	0.000143257		fract CO2/total atmosphere	3.49472e-05		m(carbon) /metric tonnes	9.26141e+10		fract CO2/total atmosphere	3.45921e-05		E(gas) /10^6 btu	7.32044e+12
Proven Natural Gas Reserves /10^9 m^3		Prop of CO2 /ppm v/v	322.278		Prop of CO2 /ppm	143.257		Prop of CO2 /ppm	34.9472		m(CO2) /metric tonnes	3.39585e+11		Prop of CO2 /ppm	34.5921		m(carbon) /kg	1.05634e+14
188100	2021 (ref 1)	Life of reserves	90.7952		Prop of CO2 /ppm v/v	95.5719		Prop of CO2 /ppm v/v	23.3145		CO2/total atmosphere	6.59644e-05		Prop of CO2 /ppm v/v	23.0776		m(carbon) /metric tonnes	1.05634e+11
Shale tight oil reserves /10^9 barrels		Sub Bituminous & Lignite									Prop of CO2 /ppm	65.9644					m(CO2) /metric tonnes	3.87324e+11
418.9	2015 (ref 2)	m(coal) /metric tonnes	320469000000		Life of Reserves	47.7014		Life of Reserves	11.6366		Prop of CO2 /ppm v/v	44.0073		Life of Reserves	11.5184		CO2/total atmosphere	7.52378e-05
Shale gas reserves /ft^3		m (carbon) /metric tonnes	192281400000														Prop of CO2 /ppm	75.2378
7576.6	2015 (ref 2)	m(CO2) /metric tonnes	705031800000								Life of Reserves	47.025					Prop of CO2 /ppm v/v	50.1939
CO2/C ratio		fract CO2/total atmosphere	0.000136953
3.66667		Prop of CO2 /ppm by wt	136.953								Carbon bombs (oil, coal and gas)						Life of Reserves	53.6358
Proportion of Carbon in Coal		Prop of CO2 /ppm v/v	91.366								Gt CO2 emissions	1182.3
0.9	2022 (ref 12)	Life of reserves	38.6107								tonne CO2	1182300000000
Proportion of Carbon in Sub-Bituminous & Lignite											prop CO2 in atm	0.000229662
0.6	2022 (ref 12)				Coal 2005						prop CO2 /ppm	229.662
		Increase in atmospheric CO2 /ppm			m(coal) /metric tonnes	478800000000					Prop of CO2 /ppm v/v	153.216
Mass of Earth's atmosphere /metric tonnes		Coal	322.278		m (carbon) /metric tonnes	430920000000
5148000000000000	2005 (ref 3)	Sub Bituminous Coal & Lignite	91.366		m(CO2) /metric tonnes	1580040000000
Density of crude oil (tonne/barrel )		Oil	95.5719		fract CO2/total atmosphere	0.000306923
0.1364	2022 (ref 4)	Oil sands	23.3145		Prop of CO2 /ppm by wt	306.923		weight cubic metre gas	0.76	kg
Proportion of carbon in oil (w/w)		Natural Gas	44.0073		Prop of CO2 /ppm v/v	204.76
0.85	(ref 5)	Shale oil	23.0776					CO2 per kg	2.75	kg
Proportion of carbon in natural gas (kg/10^6 btu)		Shale gas	50.1939		Sub Bituminous & Lignite 2005			0.8
14.43	2021 (ref 6)				m(coal) /metric tonnes	430293000000		CO2 per m3	2.09	kg
Current proportion of CO2 in atmosphere /ppm					m (carbon) /metric tonnes	258175800000			0.00209	tonnes
420.99	2022 (ref 7)	Total increase if all reserves burnt	649.809		m(CO2) /metric tonnes	946644600000		CO2 in reserves	3.93129e+11
Fossil fuel used for non-combustion purposes (USA)		Total new proportion of CO2 in atm /ppm	1070.8		fract CO2/total atmosphere	0.000183886
0.07	2018 (ref 8)				Prop of CO2 /ppm by wt	183.886
		Accounting for 7% of fossil fuels being used for non-fuel purposes			Prop of CO2 /ppm v/v	122.677
Conversion of wt/wt to Vol/Vol		Total increase if 93% reserves burnt /ppm	604.323
0.667136	2017 (ref 9)	Total new proportion of CO2 in atm /ppm	1025.31
	2000 (ref 10)
Density Oil sands
0.96 tonne/m3	2000 (ref11)
Weight per barrel
0.152628
World Oil Consumption million barrels/year
99.57	https://www.statista.com/statistics/271823/global-crude-oil-demand/
Per year
36367.9
World Coal Consumption million tonnes/day
Per year
8300	2023 (ref13) IEA
World Gas Consumption trillion m3/year
Per year
4	Statista 2022

## Sheet: Chart Tables
				Stacked Bar Chart Test
		1993-4	1994-5	1995-6	1996-7	1997-8	1998-9
	1Q Sales (Jan)	0	3289.5	1849.77	3992.5	7372.25	5994.19
	2Q Sales (Apr)	1530.12	5038.87	4991.66	0	10673.6	8009
	3Q Sales (Jul)	675.58	6531.23	9224.58	0	2050	2050
	4Q Sales (Oct)	3901	837.054	5299.37	0	3068.5	14289.5
	Total	6106.7	15696.7	21365.4	3992.5	23164.3	30342.7
	1H % of whole	0.250564	0.530582	0.320211	1	0.779035	0.461501
	Non-Fuel Usage		2022	Net burnt	GtCO2	Non-Fuel Usage		2005
	0.045	Coal	3544556400000	3385051362000	3385.05	0.045	Coal	2543689500000	2429223472500	2429.22
	0.07	Oil	7.37487e+11	6.85863e+11	685.863	0.07	Oil	5.10434e+11	4.74703e+11	474.703
	0.0375	Natural Gas	3.39585e+11	3.2685e+11	326.85	0.0375	Natural Gas	281091766527	2.70551e+11	270.551
	0.07	Oil Sands	190490784000	177156429120	177.156	0.07	Oil Sands	8.48571e+10	7.89171e+10	78.9171
	0.07	Shale Oil	1.7808e+11	1.65614e+11	165.614	0.07	Shale Oil	0	0	0
	0.0375	Shale Gas	3.87324e+11	3.728e+11	372.8	0.0375	Shale Gas	2.63785e+10	2.53893e+10	25.3893
					5113.33
			Coal	Oil	Gas			Coal	Oil	Gas
		Coal	3385	0	0		Coal	2429	0	0
		Oil		686	0		Oil		475	0
		Natural Gas	0		327		Natural Gas	0		271
		Oil Sands	0	177	0		Oil Sands	0	79	0
		Shale Oil	0	166	0		Shale Oil	0	0	0
		Shale Gas	0		373		Shale Gas	0		25
			3385	1029	700

## Sheet: Forties Field
	Discovery		1970
	Estimated size when discovered		4.6 billion barrels		https://geoexpro.com/the-first-uk-giant-oil-field/
	Recoverable reserves estimate		1.8 billion		https://www.ice.org.uk/what-is-civil-engineering/what-do-civil-engineers-do/forties-oil-field
	Production		1975
	Reserves		2.47 billion
			1975
			1991		Publication: Geological Society, London, Memoirs
					Volume 14
	Sold to Apache		2003		Pages 301 - 308
					https://doi.org/10.1144/GSL.MEM.1991.014.01.37
	BP estimate STOIIP		4.2 billion barrels
	BP Reserves		144 million barrels		https://www.drillingformulas.com/long-history-of-forties-field-north-sea/
	Estimated Extra		800 million barrels
	Estimate		2010
	Total Production		2.64 billion		https://geoexpro.com/the-first-uk-giant-oil-field/
	Apache Production 2003-12		190 million	https://www.offshore-technology.com/projects/forties-oilfield-a-timeline/
	Reserves 2012		130 million
			2015
	Apache produced		235 million barrels		https://www.hartenergy.com/ep/exclusives/forties-40-175647
	reserves		100 million
			2023
	reserves		29.3 million barrels								2640
											30

## Sheet: 2005 2022Compare
		Coal	2022	2005			2022		2005		2022	Gt CO2	2005			2022	2005
		m(coal) /metric tonnes	753600000000	478800000000		Coal	2486880000000	Coal	1580040000000		2486.88		1580.04		All Coal	3191911800000	2526684600000
		m (carbon) /metric tonnes	678240000000	406980000000		Lignite	705031800000	Lignite	946644600000		705.032		946.645		GtCO2	3191.91	2526.68
		m(CO2) /metric tonnes	2486880000000	1492260000000		Oil	7.37487e+11	Oil	5.10434e+11		737.487		510.434		All Oil	1106057370000	5.95291e+11
		fract CO2/total atmosphere	0.000483077	0.000306923		Natural Gas	3.39585e+11	Natural Gas	281091766527		339.585		281.092		GtCO2	1106.06	595.291
		Prop of CO2 /ppm by wt	483.077	306.923		Oil Sands	190490784000	Oil Sands	8.48571e+10		190.491		84.8571		All Gas	7.26909e+11	3.0747e+11
		Prop of CO2 /ppm v/v	322.278	204.76		Shale Oil	1.7808e+11	Shale Oil	0		178.08		0		GtCO2	726.909	307.47
						Shale Gas	3.87324e+11	Shale Gas	2.63785e+10		387.324		26.3785
		Sub-Bitumenous Coal&Lignite	2022	2005				5024.88		3429.45	GtCO2
		m(coal) /metric tonnes	320469000000	430300000000			5.02488e+12	1832.97	3.42945e+12	902.761	without coal
		m (carbon) /metric tonnes	192281400000	258180000000
		m(CO2) /metric tonnes	705031800000	9.4666e+11						Deducting non-fuel usage
		fract CO2/total atmosphere	0.000136953	0.000183889
		Prop of CO2 /ppm by wt	136.953	183.886		Non-Fuel Usage		2022	Net burnt	GtCO2	CO2 ppm v/v	Non-Fuel Usage		2005		GtCO2	CO2 ppm v/v				2375
		Prop of CO2 /ppm v/v	91.366	122.677		0.045	Coal	2486880000000	2374970400000	2374.97	307.776	0.045	Coal	1580040000000	1508938200000	1508.94	195.545				673
						0.045	Lignite	705031800000	673305369000	673.305	87.2546	0.045	Lignite	946644600000	904045593000	904.046	117.157				686
		Oil	2022	2005		0.07	Oil	7.37487e+11	6.85863e+11	685.863	88.8819	0.07	Oil	5.10434e+11	4.74703e+11	474.703	61.5174				327
		V(oil) /barrels	1734800000000	1200700000000		0.0375	Natural Gas	3.39585e+11	3.2685e+11	326.85	42.357	0.0375	Natural Gas	281091766527	2.70551e+11	270.551	35.0611				177
		m (oil) /metric tonnes	236626720000	163775480000		0.07	Oil Sands	190490784000	177156429120	177.156	21.6825	0.07	Oil Sands	8.48571e+10	7.89171e+10	78.9171	9.81557				166
		m (carbon) /metric tonnes	201132712000	139209158000		0.07	Shale Oil	1.7808e+11	1.65614e+11	165.614	21.4622	0.07	Shale Oil	0	0	0	0				373
		m(CO2) /metric tonnes	7.37487e+11	5.10434e+11		0.0375	Shale Gas	3.87324e+11	3.728e+11	372.8	48.3116	0.0375	Shale Gas	2.63785e+10	2.53893e+10	25.3893	3.29023				4777
		fract CO2/total atmosphere	0.000143257	9.91518e-05						4776.56	617.725					3262.54	422.386
		Prop of CO2 /ppm	143.257	99.1518
		Prop of CO2 /ppm v/v	95.5719	66.1478
		Natural Gas	2022	2005
		V(gas) / 10^9m^3	188100	1557426563507
		E(gas) / 10^12 btu	6.41816e+06	5.31264e+06
		E(gas) /10^6 btu	6.41816e+12	5312639700000
		m(carbon) /kg	9.26141e+13	76661390871000
		m(carbon) /metric tonnes	9.26141e+10	76661390871
		m(CO2) /metric tonnes	3.39585e+11	281091766527
		CO2/total atmosphere	6.59644e-05	5.46021e-05
		Prop of CO2 /ppm	65.9644	54.6021
		Prop of CO2 /ppm v/v	44.0073	36.4271
		Oil Sands	2022	2005
		barrels	423200000000	180000000000
		tonnes	57724480000	2.57143e+10
		Proportion carbon	0.9	0.9
		m(carbon) /metric tonnes	51952032000	2.31429e+10
		m(CO2) /metric tonnes	190490784000	8.48571e+10
		CO2/total atmosphere	3.49472e-05	1.55678e-05
		Prop of CO2 /ppm	34.9472	15.5678
		Prop of CO2 /ppm v/v	23.3145	10.5544
		Shale Oil	2022	2005
		V(oil) /barrels	418900000000
		m (oil) /metric tonnes	57137960000
		m (carbon) /metric tonnes	48567266000				188100000000000
		m(CO2) /metric tonnes	1.7808e+11				188.1
		fract CO2/total atmosphere	3.45921e-05				214.543
		Prop of CO2 /ppm	34.5921
		Prop of CO2 /ppm v/v	23.0776
		Shale gas	2022	2008
		V(gas) / ft^3	7576600000000000	516000000000000
		V(gas /m^3	2.14543e+14	1.46114e+13
		V(gas) / 10^9m^3	214543	14611.4
		E(gas) / 10^12 btu	7.32044e+06	498554
		E(gas) /10^6 btu	7.32044e+12	4.98554e+11
		m(carbon) /kg	1.05634e+14	7.19413e+12
		m(carbon) /metric tonnes	1.05634e+11	7.19413e+09
		m(CO2) /metric tonnes	3.87324e+11	2.63785e+10
		CO2/total atmosphere	7.52378e-05	5.12403e-06
		Prop of CO2 /ppm	75.2378	5.12403
		Prop of CO2 /ppm v/v	50.1939	3.41843
		Total m(CO2) metric tonnes	4.31985e+12	2.39502e+12
		Total ppmv/v	649.809	443.984

## Sheet: 2005
	World Oil reserves									ref 1
	Barrels		1200700000000	ref 1		BP review World Energy 2005
	Metric tonnes		1.60952e+11
						Consumption 1859-1968		200000000000	ref 2
	Proportion of carbon in Crude oil		0.849	ref 4		Consumption 1965-2005		917000000000	ref 3
	Tonnes carbon in world oil reserves		1.36648e+11
	Equivalent tonnes CO2		5.01043e+11
							Total tonnes CO2
	Total weight of earth's atmosphere		5360000000000000	ref 5			3.48507e+12
	So proportion C02 if all oil burnt		9.34781e-05
		In ppm (weight)	93.4781
	Convert ppm (weight) to volume		0.666667	ref 9
		ppm (volume)	62.3188
	Canadian Oil Sands
		barrels	180000000000
		tonnes	2.57143e+10
	Proportion carbon		0.9
	Tonnes carbon		2.31429e+10
	Tonnes CO2		8.48571e+10		3.48507e+12
	Total weight of earth's atmosphere		5360000000000000
	Proportion CO2 if all canadian oil sands burnt		1.58316e-05
		In ppm	15.8316
		ppm (volume)	10.5544
	Coal current reserves		770815000000
	Proportion carbon		0.9
	Tonnes carbon		693733500000	ref 6
	Tonnes CO2		2543689500000
										refs 2,3	http://en.wikipedia.org/wiki/Oil_reserves
	Total weight of earth's atmosphere		5360000000000000
	Proportion CO2 if all coal burnt		0.000474569							ref 4
		In ppm	474.569
		ppm (volume)	316.379
	Natural gas reserves (cubic feet)		5500000000000000	ref 7
		Conversion factor	35.3147
			1.55743e+14	cubic metres
		total carbon	1.29266e+11
		Tonnes CO2	3.55483e+11
	Total weight of earth's atmosphere		5360000000000000
	Proportion CO2 if all gas burnt		6.63214e-05
		In ppm	66.3214
		ppm (volume)	44.2143
		Current CO2	370
		(ppm)
	Amount if all oil burnt		432.319
		Plus tar sands	442.873
		Plus coal	759.252
		Plus Gas	803.467
	Shale gas			Source
	V(gas) / ft^3	516000000000000		AVAILABILITY, ECONOMICS,
	V(gas /m^3	1.46114e+13		AND PRODUCTION POTENTIAL OF NORTH AMERICAN UNCONVENTIONAL NATURAL GAS SUPPLIES
	V(gas) / 10^9m^3	14611.4		https://www.ingaa.org/File.aspx?id=7878
	E(gas) / 10^12 btu	498554
	E(gas) /10^6 btu	4.98554e+11
	m(carbon) /kg	7.19413e+12		INGAA Foundation 2008
	m(carbon) /metric tonnes	7.19413e+09
	m(CO2) /metric tonnes	2.63785e+10		https://www.eia.gov/todayinenergy/detail.php?id=11611
	CO2/total atmosphere	5.12403e-06		Shale oil and shale gas resources are globally abundant
	Prop of CO2 /ppm	5.12403								ref 5
	Prop of CO2 /ppm v/v	3.41843
											ref 6	http://www.worldcoal.org/pages/content/index.asp?PageID=188
										ref 7	http://www.eia.doe.gov/oiaf/analysispaper/global/natgas.html
										ref 8	http://www.epa.gov/gasstar/pdf/unitconverter_final.pdf
										ref 9
											http://en.wikipedia.org/wiki/Carbon_dioxide

## Sheet: Carbon Sinks
			Amount Emission at Present					35000000000
			Amount Emissions to use all Reserves					4.91134e+12
										140.324	years
			TimeScale (years)					50
			Amount emissons per year if carbon burnt in time period					9.82268e+10
												What is the expected use of reserves from discount rate?
			Proportion going to Forests					2600000000
			Proportion going to Soil					1.22783e+12
			Proportion going to ocean					1.22783e+12
			Total Absorbed					2.45827e+12
			Total to atmosphere					2.45307e+12		0.499471
			Weight of atmosphere					5360000000000000
			Incremental change in atmosphere pa					0.000457662	(proportion)
				Annual ppm pa				9.77742	ppm (wt)
				Annual ppm pa				6.51828	ppm(vol)
			Change over period					325.914	ppm(vol)
			New Estimated total C02 in Atmosphere					738.914	ppm(vol)
		Forests		2.6	billion tonnes		https://www.clientearth.org/latest/latest-updates/stories/what-is-a-carbon-sink/
		Soil		quarter human emissions'			https://www.clientearth.org/latest/latest-updates/stories/what-is-a-carbon-sink/
		Ocean		quarter all emissions			https://www.clientearth.org/latest/latest-updates/stories/what-is-a-carbon-sink/

## Sheet: Sinks&CarbonEmissions
	Cumulative Emisions 2005-2022										Carbon Saved by Converting Coal to Gas
		Source:		https://ourworldindata.org/co2-emissions						Thermal Power Station				Conversions Source		https://www.ocean.washington.edu/courses/envir215/energynumbers.pdf
										Power Output		1000	MW
			2005	29614602000						Notional Energy Output		8760000	MWh
			2006	30593118000						Capacity Factor		0.6
			2007	31506788000						Energy Output		5256000	MWh
World CO2 emissions			2008	32085836000															Cost Saving Gas vs Coal
			2009	31564032000						Coal Chemical Energy		30	MJ/kg	Gas Chemical Energy		37.3	MJ/m3		Carbon Price 0	0.153846
			2010	33364347000								30000	MJ/tonne			35300	Btu		$20/tonne	0.345679
			2011	34487013000												0.0103611	MWh		$50/tonne	0.447837
			2012	35006270000						Energy Conversion		1	KWh	Mass of m3 natural gas		0.76	kg		$75/tonne	0.488417
			2013	35319200000								3600000	Joules
			2014	35577537000								1	MWh
			2015	35558568000								3600	MJ
			2016	35524190000
			2017	36096737000						Energy from 1 tonne Coal		8.33333	MWh	Energy 1 tonne gas		13.633
			2018	36826510000
			2019	37082560000						Theoretical mass of coal to produce power				Theoretical Volume of Gas to produce power
			2020	35264086000								630720				5.07282e+08	m3
			2021	37123850000						Coal Thermal Efficiency				Gas Thermal Efficiency
			Total	582595244000	582.595							0.37				0.55
										Practical Mass of Coal to produce power				Practical Volume of Gas to produce power
	Weight of atmosphere			5360000000000000												9.2233e+08	m3
												1.70465e+06	tonnes	Mass of Gas		700971	tonnes	2.75
	Incremental change in atmosphere pa			0.000108693	(proportion)
		Change in ppm over period		108.693	ppm (wt)					Proportion of Carbon		0.8		Proportion of carbon		0.75
		Change in ppm over period		72.5132	ppm(vol)
	Actual CO2 in 2005			379	ppm(vol)					Carbon emitted		1.36372e+06		Carbon emitted		525728
	Actual CO2 in 2022			417.2	ppm(vol)					CO2 emitted		5.0003e+06		CO2 emitted		1.92767e+06
				38.2

## Sheet: Carbon Budgets
		66% Chance	50% Chance			Source IPCC SR15		https://www.ipcc.ch/sr15/
	RCP 1.5	420	580	GtCO2
	RCP2.6		990
		CO2 Emissions 2012-2022		Economist Our World in data
	2012	35006270000		https://ourworldindata.org/co2-emissions
	2013	35319200000
	2014	35577537000
	2015	35558568000
	2016	35524190000
	2017	36096737000
	2018	36826510000
	2019	37082560000
	2020	35264086000
	2021	37123850000
	2022	36800000000		International Energy Agency
				https://www.iea.org/reports/co2-emissions-in-2022
	Total 2013-22	361173238000	361.173
