# Supplementary material for: What happens if we ‘burn all the carbon’? carbon reserves, carbon budgets, and policy options for governments
Source: Royal Society of Chemistry journal article supplement (doi:10.1039/d3ea00107e), 2024-01-01
Supplement: d3ea00107e2.xlsx [file d3ea00107e2.xlsx]

## Sheet: Table8GtCO2
	Table 8 | Potential CO2 Emissions from All Reserves (Gt CO2)
	Parameter	2022 Values	2005 Values		Parameter	Source	2022 Values	2005 Values		Parameter	Year	Coal	Natural Gas	Shale Gas	Oil	Oil Sands	Shale Oil
	Coal	3545	2544		Coal	Coal	3545	2544		Coal	2022v	3545
	Oil	737.5	510.4		Gas	Natural Gas	339.6	281.1			2005v	2544
	Natural Gas	339.6	281.1		Gas	Shale Gas	387.3	26.4		Gas	2022v		339.6	387.3
	Oil Sands	190.5	84.7		Oil	Oil	737.5	510.4			2005v		281.1	26.4
	Shale Oil	178.1	0		Oil	Oil Sands	190.5	84.7		Oil	2022v				737.5	190.5	178.1
	Shale Gas	387.3	26.4		Oil	Shale Oil	178.1	0			2005v				510.4	84.7	0
	Total	5378	3446

## Sheet: Table9CO2PPM
		Table 9 | Potential Increase in CO2 Concentration in Atmosphere (ppm v/v)
		Parameter	2022 Values	2005 Values		Parameter	Year	Coal	Natural Gas	Shale Gas	Oil	Oil Sands	Shale Oil
		Coal	459	330		Coal	2022	459
		Oil	96	66			2005	330
		Natural Gas	23	36		Gas	2022		23	50
		Oil Sands	44	11			2005		36	3
		Shale Oil	23	0		Oil	2022				96	44	23
		Shale Gas	50	3			2005				66	11	0
		Sub-totals	696	446
		Starting concentration in each year	417	370
		‘Burn it all’ Total	1113	816

## Sheet: Table10GtCO2
		Table 10 | Potential CO2 Emissions deducting non-fuel uses (Gt CO2)
		Parameter		2022 Values	2005 Values
			Non Fuel usage				Parameter	Year	Coal	Lignite	Natural Gas	Shale Gas	Oil	Oil Sands	Shale Oil
		Coal	0.045	2375	1509		Coal	2022	2375	673
		Lignite	0.045	673	904			2005	1509	904
		Oil	0.07	685.9	474.7		Gas	2022			326.9	372.8
		Natural Gas	0.0375	326.9	270.6			2005			270.6	25.4
		Oil Sands	0.07	177.2	78.9		Oil	2022					685.9	177.2	165.6
		Shale Oil	0.07	165.6	0			2005					474.7	78.9	0
		Shale Gas	0.0375	372.8	25.4
		Total		4777	3262.6
			Total Coal	3048	2413
			Total Oil	1028.7	553.6
			Total Gas	699.7	296

## Sheet: Table11CO2PPM
			Table 11 | Potential Increase in CO2 Concentration in Atmosphere, deducting non-fuel uses (ppm v/v)
				Parameter	2022 Values	2005 Values
		Non Fuel usage						Parameter	Year	Coal	Lignite	Natural Gas	Shale Gas	Oil	Oil Sands	Shale Oil
		0.045		Hard Coal	308	196		Coal	2022	308	87
		0.045		Brown Coal' Lignite etc	87	117			2005	196	117
		0.07		Oil	89	62		Gas	2022			42	48
		0.0375		Natural Gas	42	35			2005			35	3
		0.07		Oil Sands	22	10		Oil	2022					89	22	21
		0.07		Shale Oil	22	0			2005					62	10	0
		0.0375		Shale Gas	47.8	2.9
				Incremental Sub-Totals	617.8	422.9
				Starting concentration in each year	417	370
				‘Burn it all’ Total	1034.8	792.9
		Total Coal		395
		Total Oil		133
		Total Gas		89.8

## Sheet: Table12GtCO2 (77years)
		Table 12 | Potential CO2 Emissions over 77 years (Gt CO2)
		Parameter		100+ year values	77 Years Values
			Years of Reserves				Parameter	Year	Coal	Lignite	Natural Gas	Shale Gas	Oil	Oil Sands	Shale Oil
		Hard Coal	130	2376	1407.32		Coal		1407	399
		Brown Coal' Lignite etc	130	673	398.623
		Oil	70	685.9	754.49		Gas				249	284
		Natural Gas	101	326.9	249.221
		Oil Sands	70	177.2	194.92		Oil						754	195	182
		Shale Oil	70	165.6	182.16
		Shale Gas	101	372.8	284.214
		Total		4777.4	3470.95
			Total Coal	3049	1805.95
			Total Oil	1028.7	1131.57
			Total Gas	699.7	533.435

## Sheet: Table13CO2PPM (77years)
			Parameter	100+ year values	77 Years Values	Values with 47% Absorption
		Years of Reserves					Parameter	Year	Coal	Lignite	Natural Gas	Shale Gas	Oil	Oil Sands	Shale Oil
		130	Hard Coal	308	182.431	85.7425	Coal		86	24
		130	Brown Coal' Lignite etc	87	51.5308	24.2195
		70	Oil	89	97.9	46.013	Gas				15	17
		101	Natural Gas	42	32.0198	15.0493
		70	Oil Sands	22	24.2	11.374	Oil						46	11	11
		70	Shale Oil	22	24.2	11.374
		101	Shale Gas	47.8	36.4416	17.1275
			Incremental Sub-Totals	617.8	448.723	210.9
			Starting concentration in 2023	417	417	417
			‘Burn it all’ Total	1034.8	865.723	627.9
		Total Coal	395
		Total Oil	133
		Total Gas	89.8
